# Supplementary material
Source: PubMed Central journal article supplement (PMC7442315)

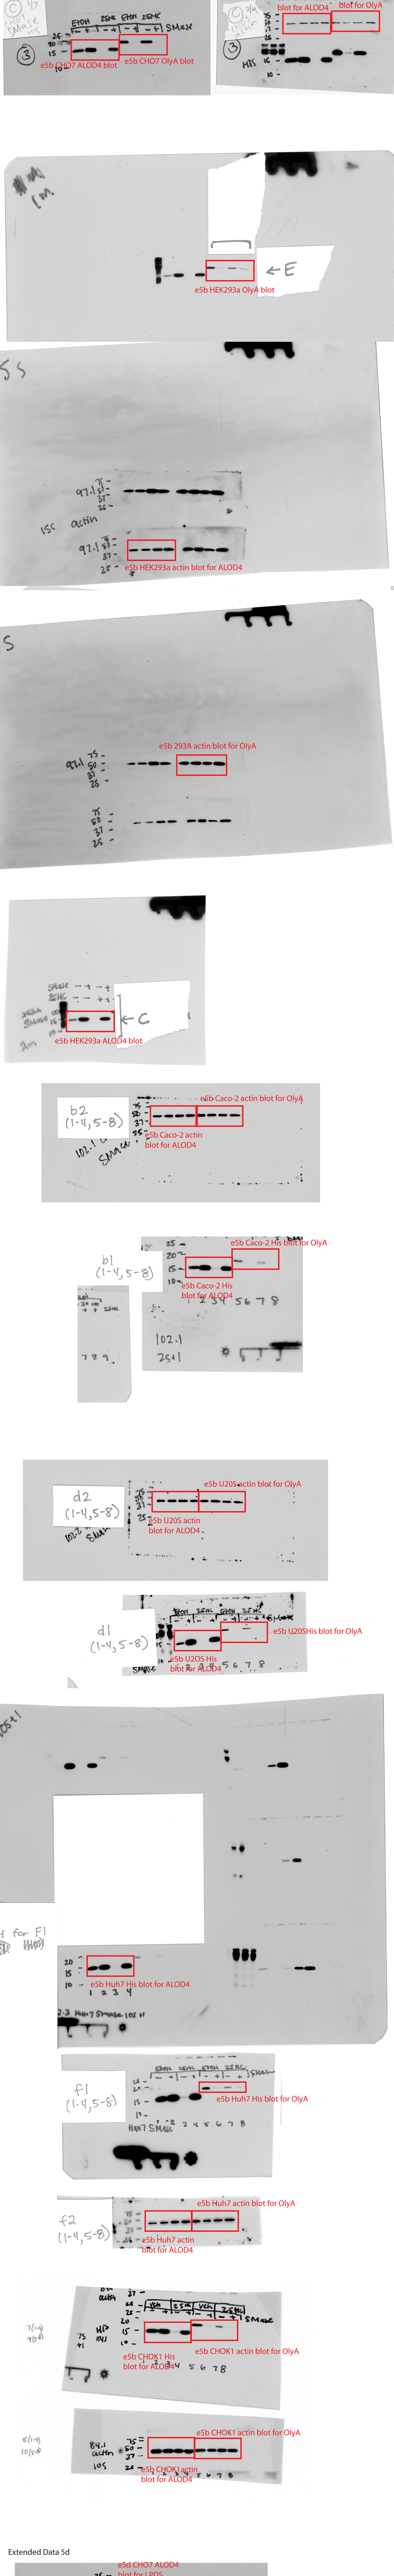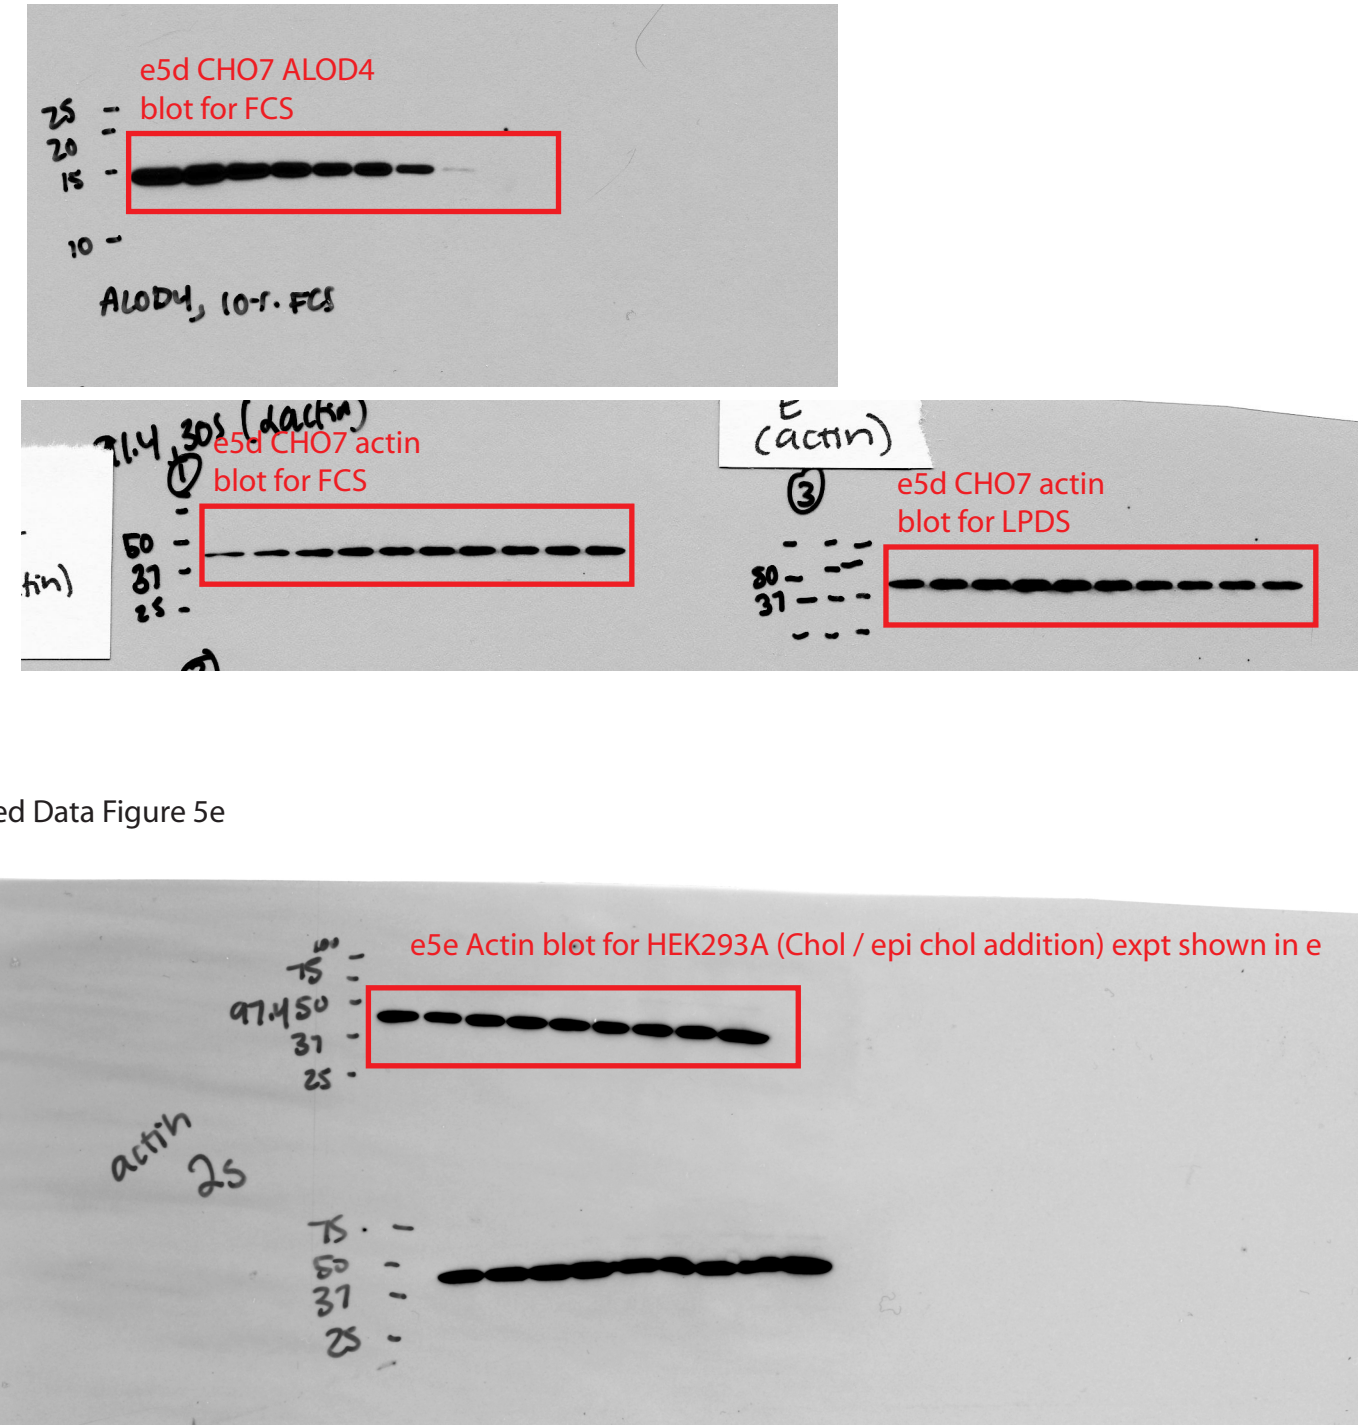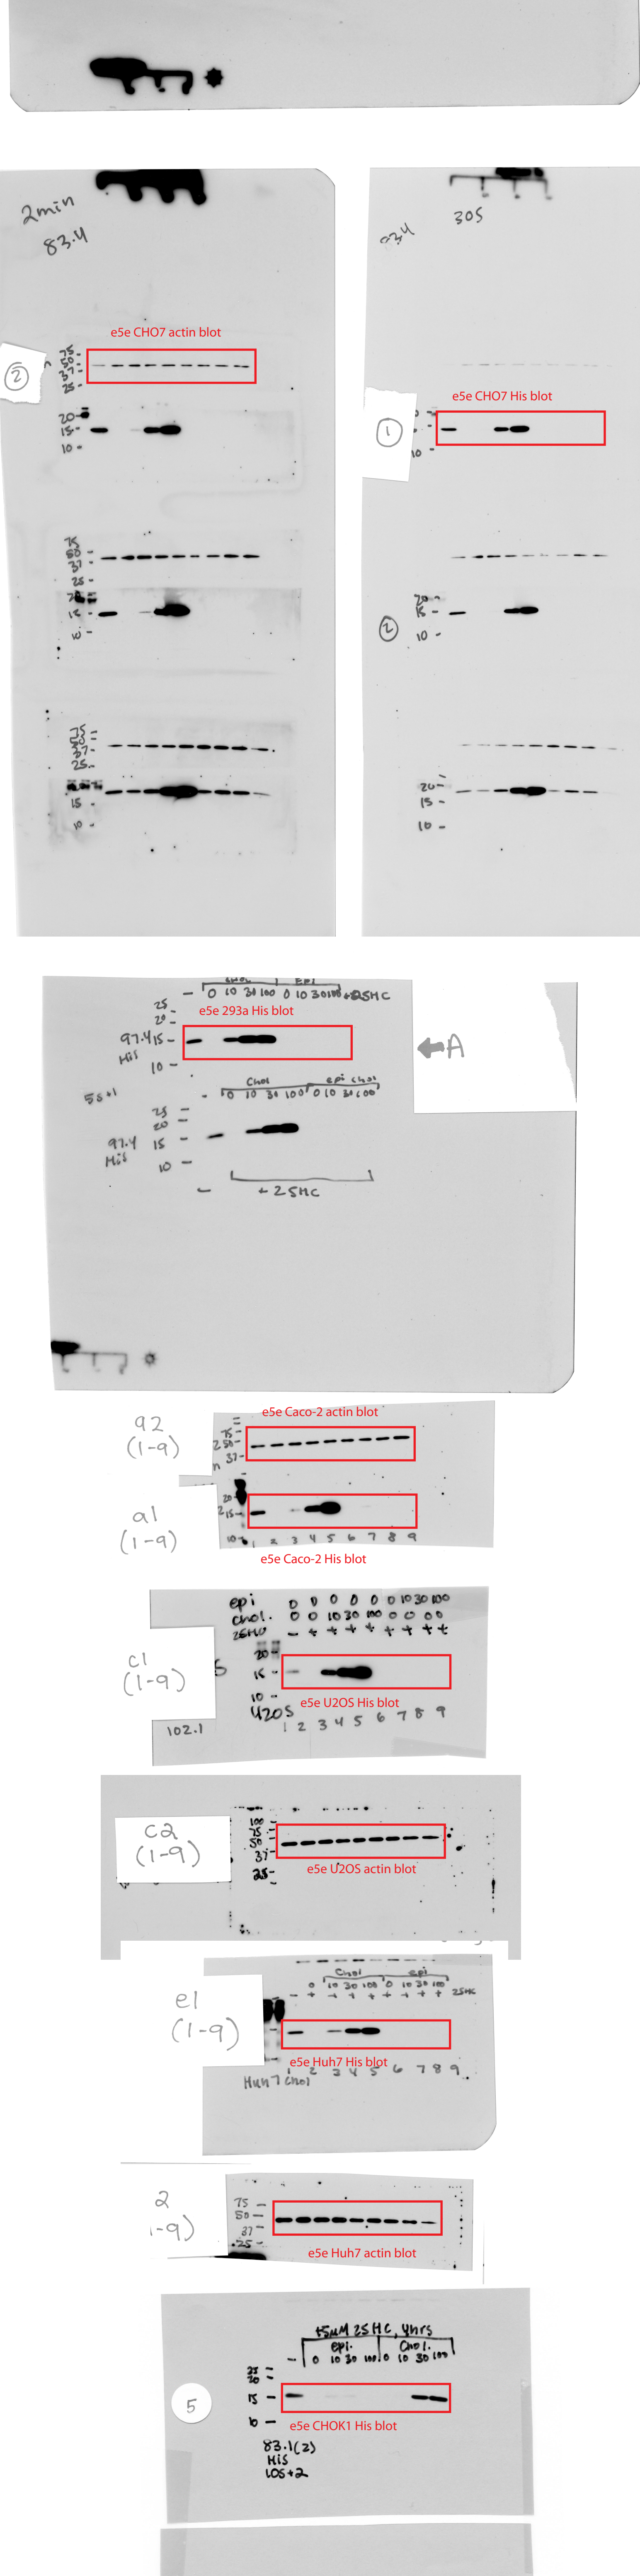

Supplement: NIHMS1612947-supplement-Extended_Data_Figure_5_original_scans.pdf [file NIHMS1612947-supplement-Extended_Data_Figure_5_original_scans.pdf]

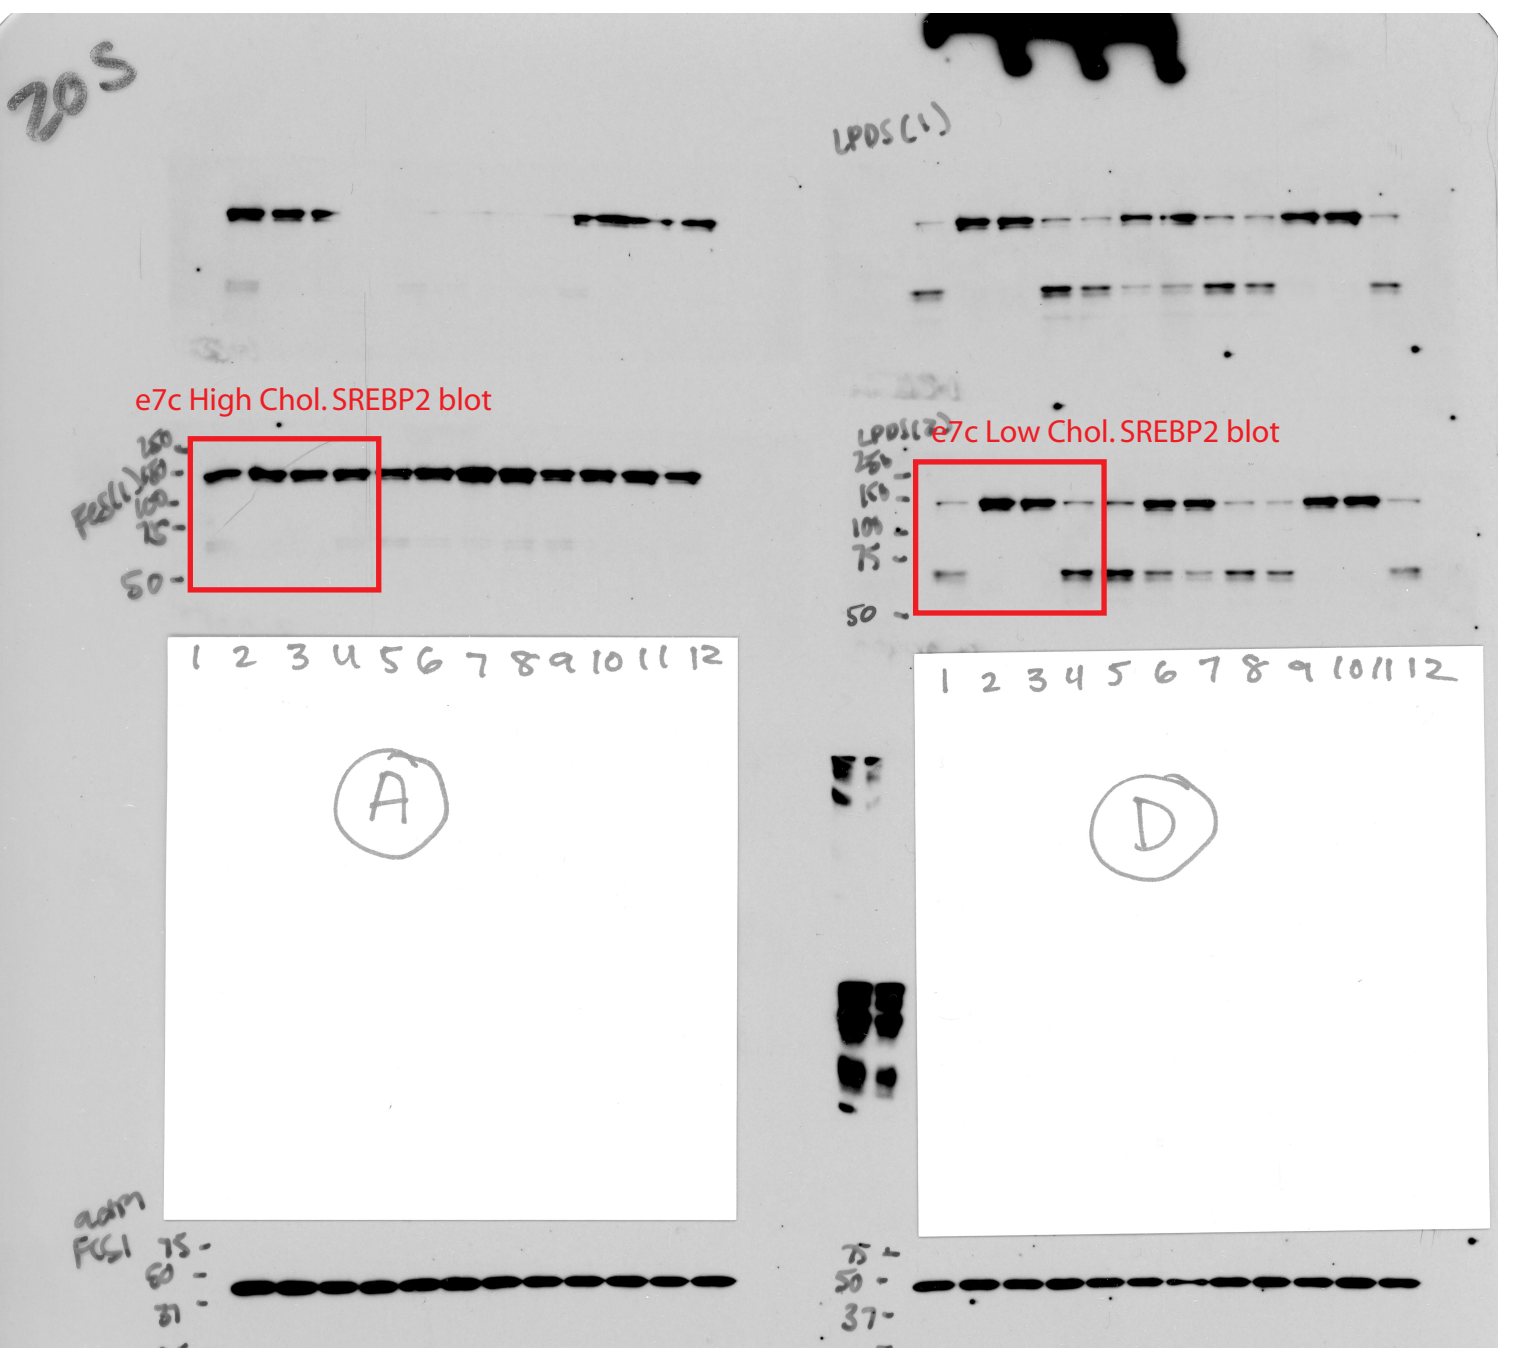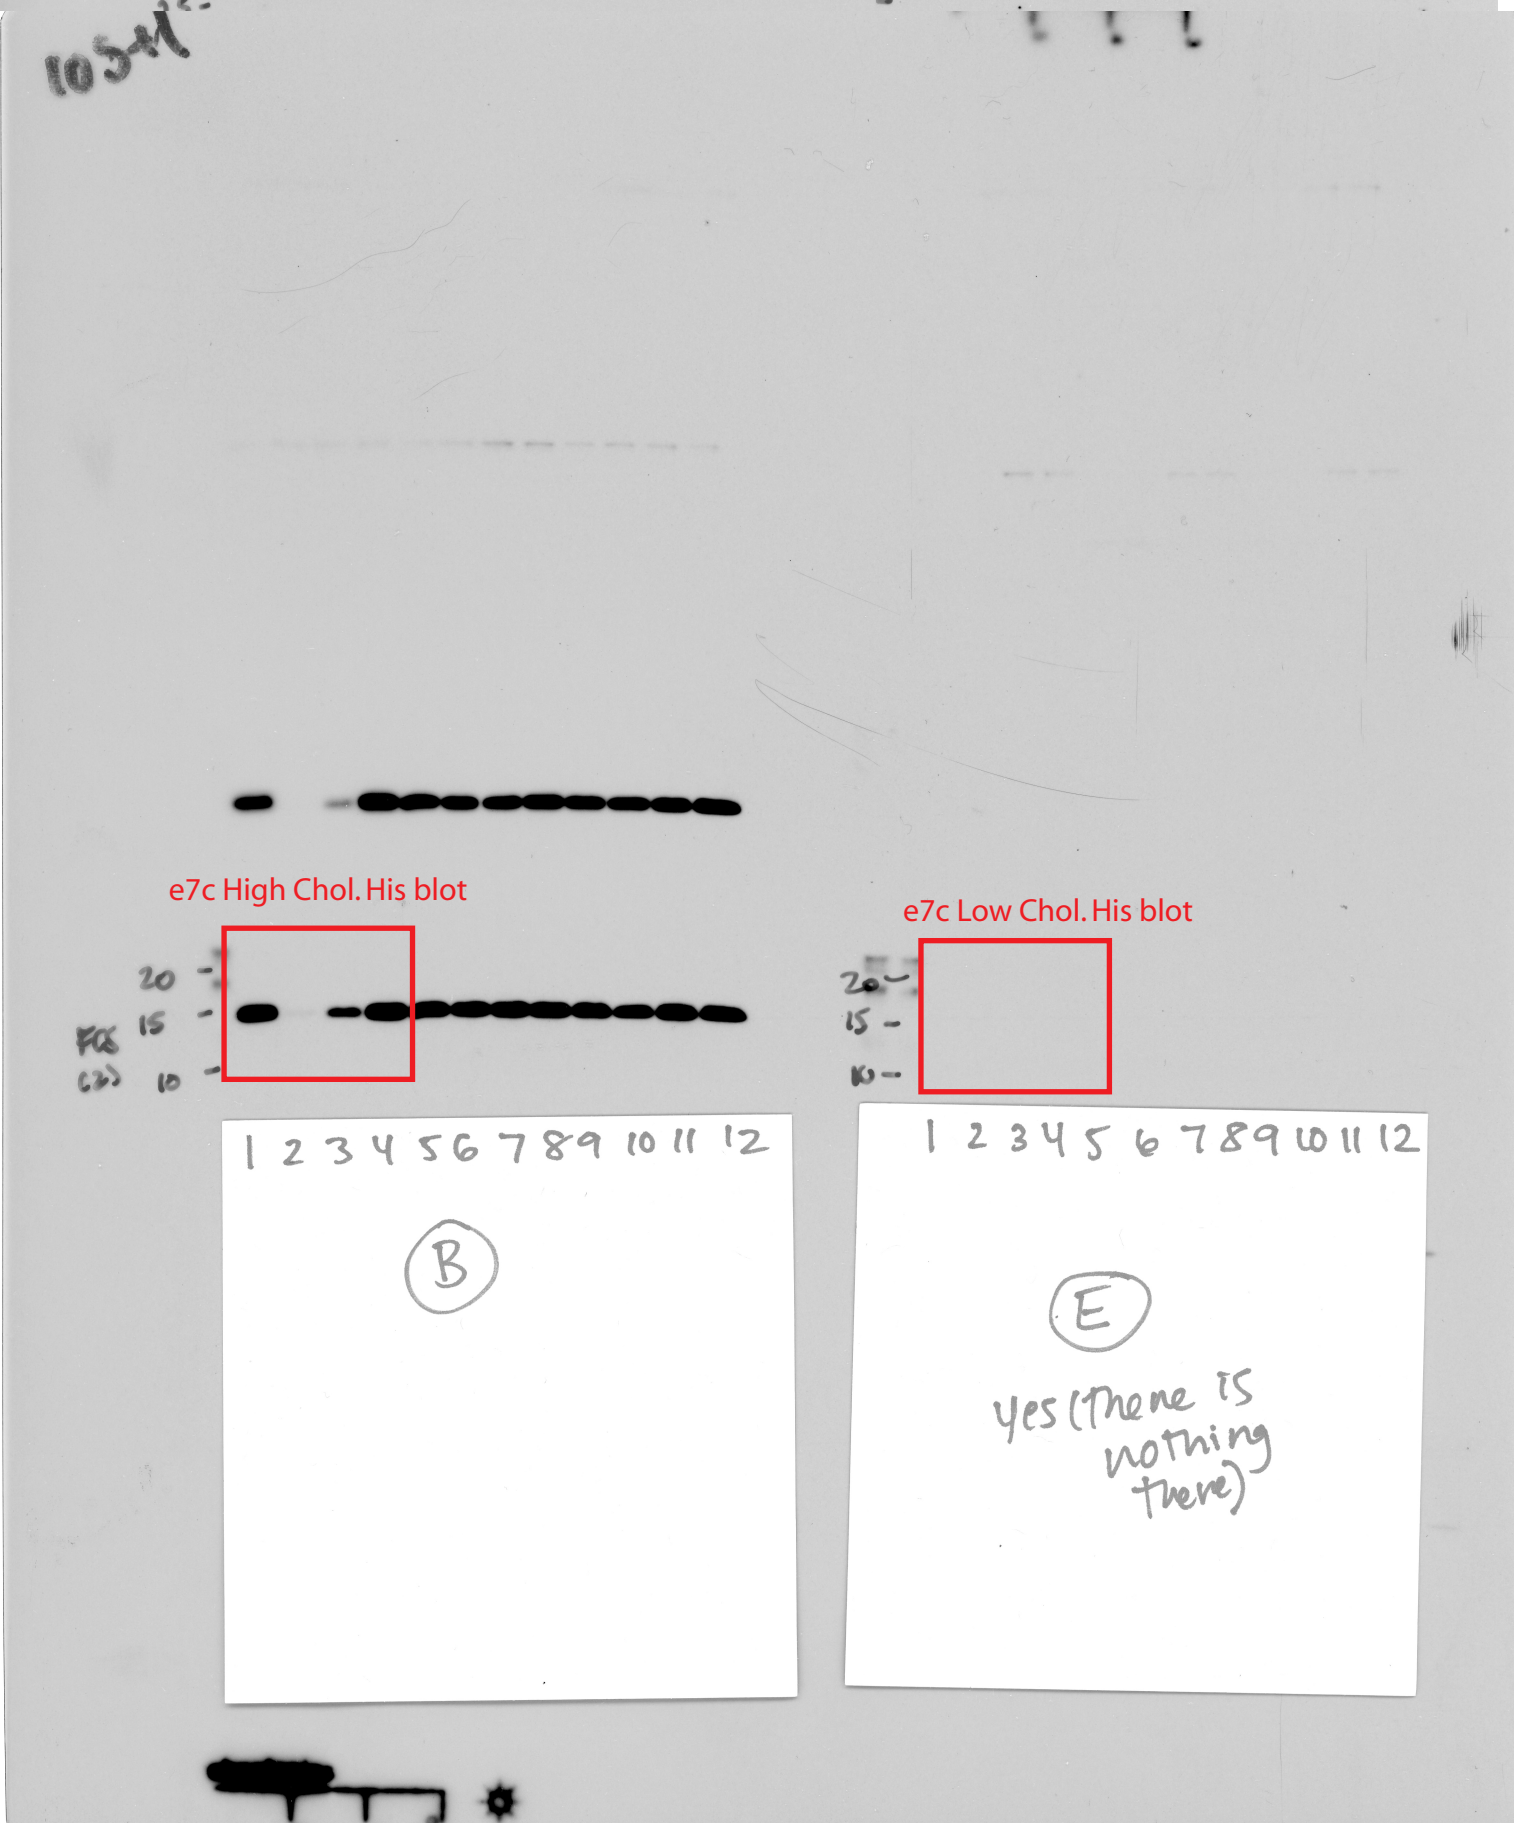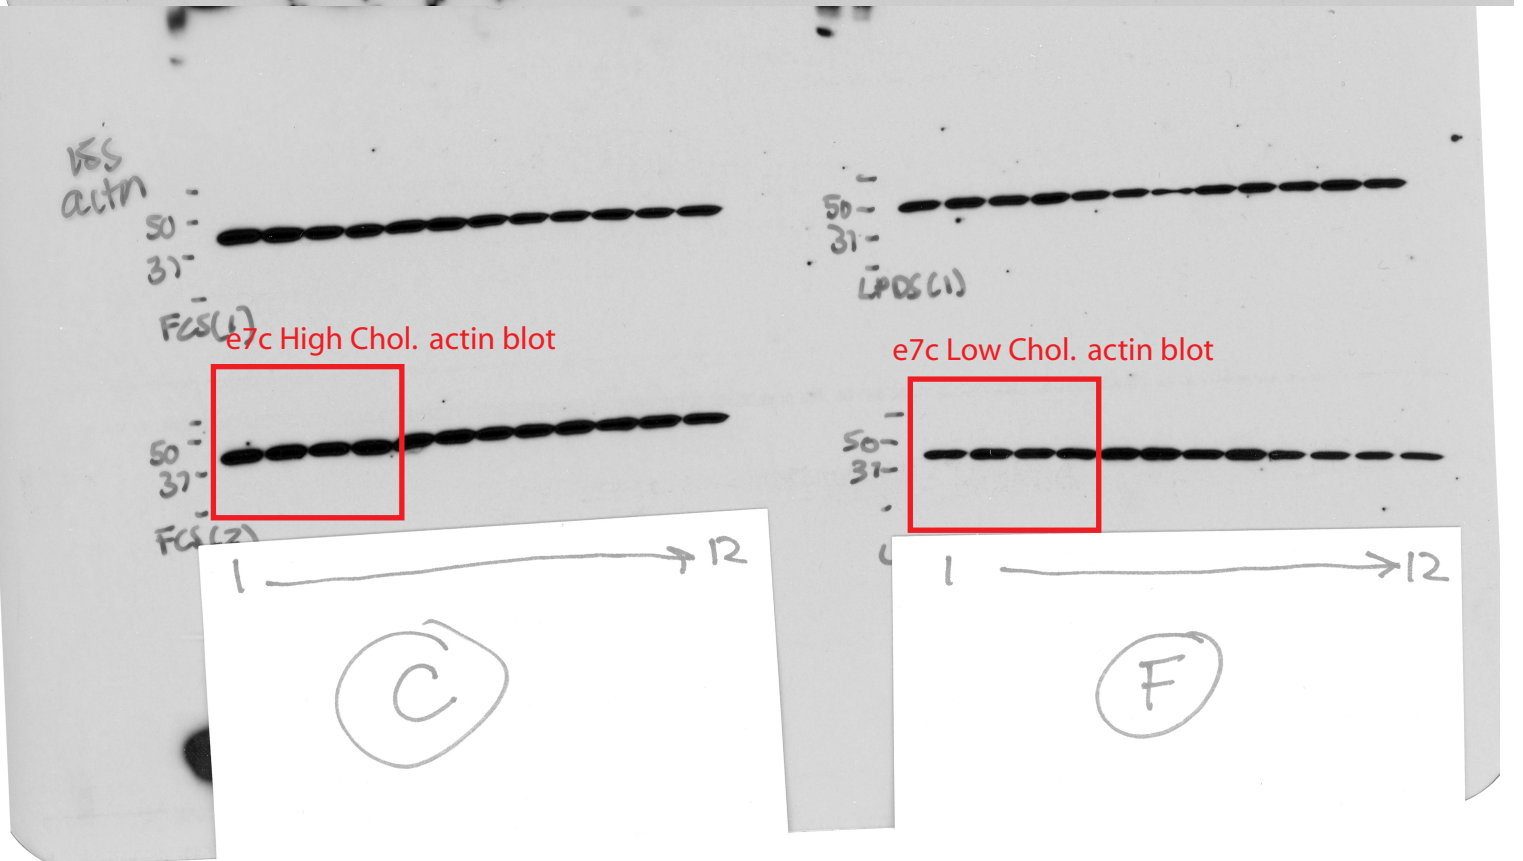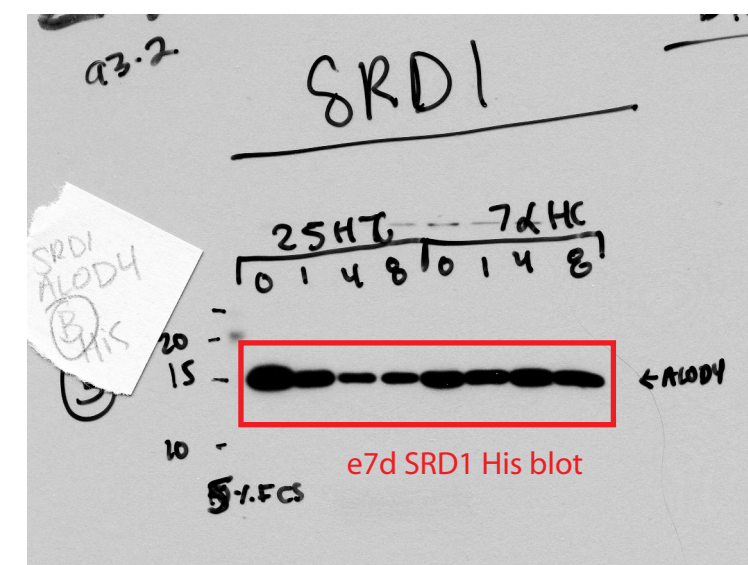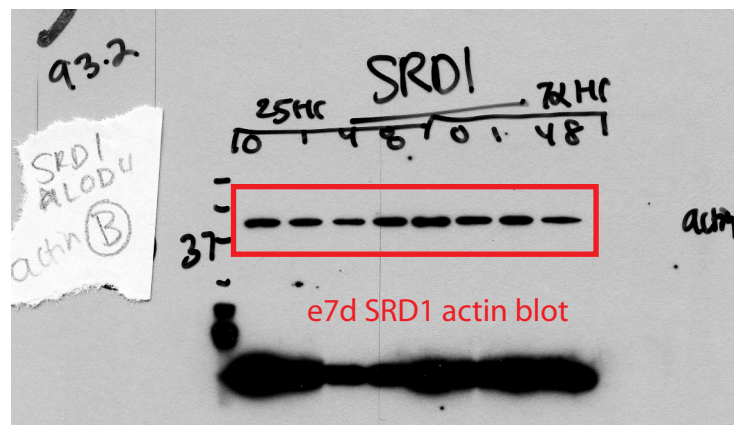

Supplement: NIHMS1612947-supplement-Extended_Data_Figure_7_original_scans.pdf [file NIHMS1612947-supplement-Extended_Data_Figure_7_original_scans.pdf]

Figure 5b original scans

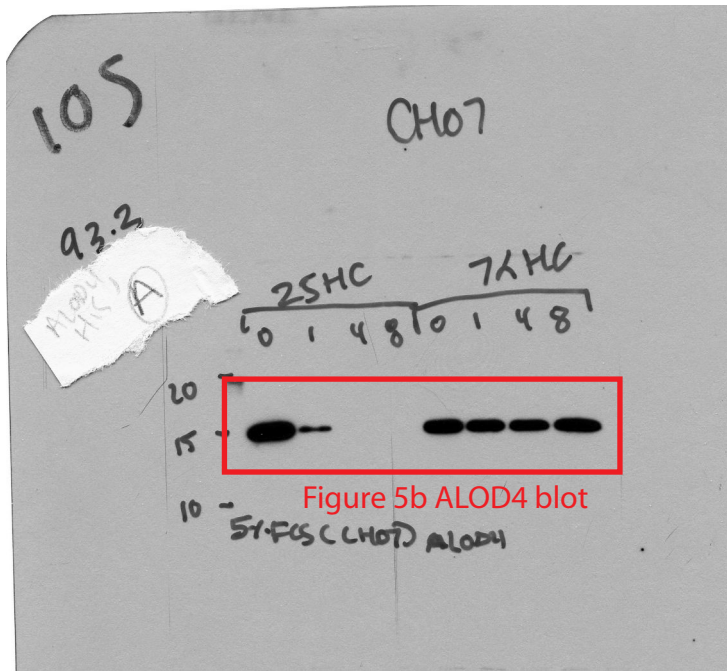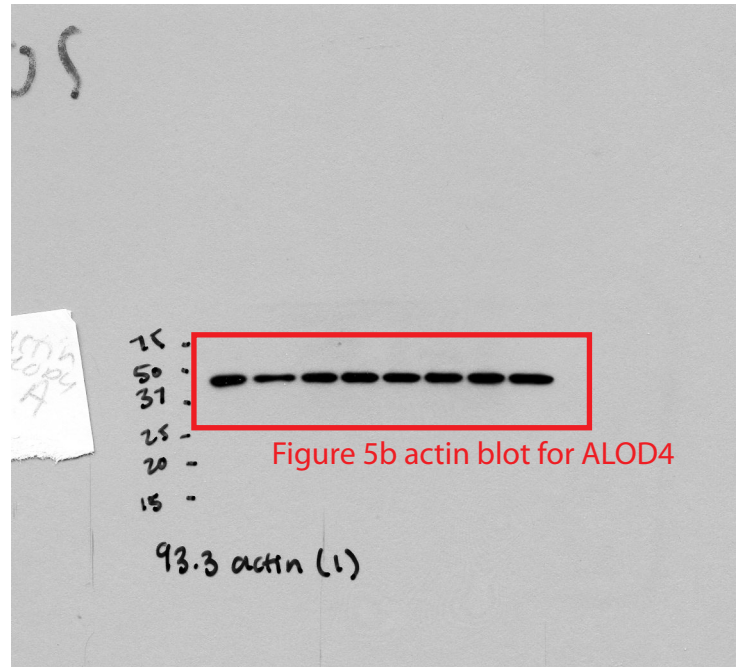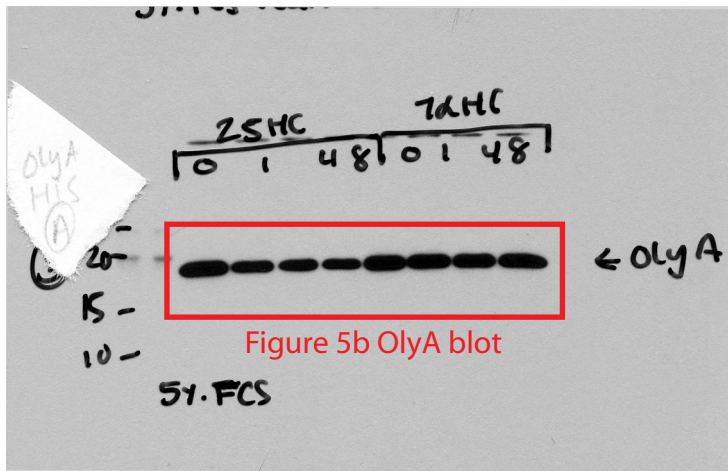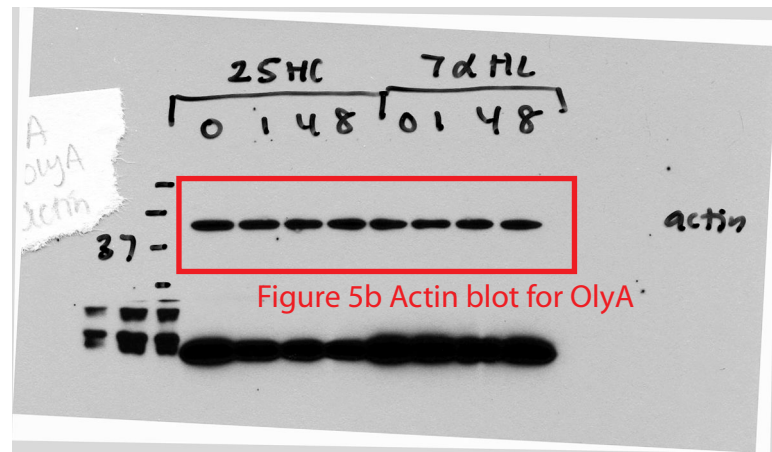

Supplement: NIHMS1612947-supplement-Figure_5_original_scans.pdf [file NIHMS1612947-supplement-Figure_5_original_scans.pdf]
